# Supplementary material for: Novel SARS-CoV-2 spike variant identified through viral genome sequencing of the pediatric Washington D.C. COVID-19 outbreak
Source: bioRxiv or medRxiv preprint supplement (doi:10.1101/2021.02.08.21251344), 2021-02-10
Supplement: Supplementary file [file media-1.zip]

Supplemental 2A: B.1.189 variation summary

B.1.189 S:N679S Nt Substitutions

|                                                     |       |        |        |        |        |        |        |        |        |        |        |         |         |         |         |         |         |         |         |         |         |         |         |         |         |         |         |         |       |         |         |         |         |
|-----------------------------------------------------|-------|--------|--------|--------|--------|--------|--------|--------|--------|--------|--------|---------|---------|---------|---------|---------|---------|---------|---------|---------|---------|---------|---------|---------|---------|---------|---------|---------|-------|---------|---------|---------|---------|
| CNH-B-40                                            | 241   | 1955   | 2710   | 3037   | 3606   | 4276   | 4582   | 5672   | 6160   | 6318   | 9246   | 10336   | 10340   | 11200   | 11408   | 11919   | 14408   | 15756   | 15879   | 16293   | 16887   | 20268   | 21214   | 23403   | 23598   | 25642   | 25922   | 26222   | 28957 | 29642   | 29738   | 29868   | 29900   |
| USA/VA-DCLS-1853/2020 EPI_ISL_614077 2020-09-23     | C241T | A1955C | C2710T | C3037T |        | C4276T | C4582T |        | T6160C | C6318T |        |         |         |         | C11919T | C14408T |         |         |         | C16293T | C16887T | A20268G | C21214T | A23403G | A23598G |         | G25922T | C26222T |       |         |         | C29738T |         |
| USA/MD-MDH-0280/2020 EPI_ISL_629060 2020-10-13      | C241T | A1955C |        | C3037T |        | C4276T | C4582T | C5672T | T6160C | C6318T | C9246T | C10336T | C10340T | C11200T | T11408C | C11919T | C14408T |         |         |         | C16293T | C16887T | A20268G | C21214T | A23598G |         | G25922T | C26222T |       |         |         | C29738T | G29868G |
| USA/MD-MDH-0281/2020 EPI_ISL_629061 2020-10-13      | C241T | A1955C |        | C3037T |        | C4276T | C4582T |        | T6160C | C6318T | C9246T | C10336T | C10340T |         | T11408C | C11919T | C14408T |         |         |         | C16293T | C16887T | A20268G | C21214T | A23403G |         | G25922T | C26222T |       |         |         | C29738T | A29900G |
| USA/MD-MDH-0282/2020 EPI_ISL_629062 2020-10-13      | C241T | A1955C |        | C3037T |        | C4276T | C4582T |        | T6160C | C6318T | C9246T | C10336T | C10340T |         | T11408C | C11919T | C14408T |         |         |         | C16293T | C16887T | A20268G | C21214T | A23403G | C25642T | G25922T | C26222T |       |         |         | C29738T |         |
| USA/MD-MDH-0353/2020 EPI_ISL_648292 2020-10-20      | C241T | A1955C |        | C3037T |        | C4276T | C4582T |        | T6160C | C6318T | C9246T | C10336T | C10340T |         | T11408C | C11919T | C14408T |         |         |         | C16293T | C16887T | A20268G | C21214T | A23403G |         | G25922T | C26222T |       |         |         | C29738T |         |
| USA/MD-MDH-0354/2020 EPI_ISL_648293 2020-10-20      | C241T | A1955C |        | C3037T |        | C4276T | C4582T |        | T6160C | C6318T | C9246T | C10336T | C10340T |         | T11408C | C11919T | C14408T |         |         |         | C16293T | C16887T | A20268G | C21214T | A23403G | C25642T | G25922T | C26222T |       |         |         | C29738T |         |
| USA/DE-CDC-2-3693752/2020 EPI_ISL_803105 2020-10-20 | C241T | A1955C |        |        | C3037T | G3606T | C4276T | C4582T |        | T6160C |        |         |         |         | C11919T | C14408T | T15756G | C15879T |         |         | C16293T | C16887T | A20268G | C21214T | A23403G | A23598G | G25922T |         |       | C28957T | C29642T | C29738T |         |
| USA/DE-CDC-2-3693674/2020 EPI_ISL_803106 2020-10-21 | C241T |        |        | C3037T | G3606T | C4276T | C4582T |        | T6160C |        |        |         |         |         | C11919T | C14408T | T15756G | C15879T | C16293T | C16887T | A20268G | C21214T | A23403G | A23598G |         | G25922T |         |         |       | C28957T | C29642T | C29738T |         |

B.1.189 S:N679S AA Substitutions

| Sample                                              | ORF10      | ORF1a       | ORF1b        | ORF3a        | Spike       |
|-----------------------------------------------------|------------|-------------|--------------|--------------|-------------|
| CNH-B-40                                            |            | ORF1a:K564Q | ORF1a:P2018L | ORF1a:S3885F | ORF1b:P314L |
| USA/VA-DCLS-1853/2020 EPI_ISL_614077 2020-09-23     |            | ORF1a:K564Q | ORF1a:P2018L | ORF1a:S3885F | ORF1b:P314L |
| USA/MD-MDH-0280/2020 EPI_ISL_629060 2020-10-13      |            | ORF1a:K564Q | ORF1a:P2018L | ORF1a:S3885F | ORF1b:P314L |
| USA/MD-MDH-0281/2020 EPI_ISL_629061 2020-10-13      |            | ORF1a:K564Q | ORF1a:P2018L | ORF1a:S3885F | ORF1b:P314L |
| USA/MD-MDH-0282/2020 EPI_ISL_629062 2020-10-13      |            | ORF1a:K564Q | ORF1a:P2018L | ORF1a:S3885F | ORF1b:P314L |
| USA/MD-MDH-0353/2020 EPI_ISL_648292 2020-10-20      |            | ORF1a:K564Q | ORF1a:P2018L | ORF1a:S3885F | ORF1b:P314L |
| USA/MD-MDH-0354/2020 EPI_ISL_648293 2020-10-20      |            | ORF1a:K564Q | ORF1a:P2018L | ORF1a:S3885F | ORF1b:P314L |
| USA/DE-CDC-2-3693752/2020 EPI_ISL_803105 2020-10-20 | ORF10:Q29* | ORF1a:K564Q | ORF1a:P2018L | ORF1a:S3885F | ORF1b:P314L |
| USA/DE-CDC-2-3693674/2020 EPI_ISL_803106 2020-10-21 | ORF10:Q29* | ORF1a:K564Q | ORF1a:P2018L | ORF1a:S3885F | ORF1b:P314L |
