# Supplementary material for: Novel SARS-CoV-2 spike variant identified through viral genome sequencing of the pediatric Washington D.C. COVID-19 outbreak
Source: bioRxiv or medRxiv preprint supplement (doi:10.1101/2021.02.08.21251344), 2021-02-10
Supplement: Supplementary file [file media-1.zip]

| Supplemental 2 | AA            | AA_3 | AA_1 | Count N679-sub | Complete | Complete and high coverage | ProP1.0 Score |
|----------------|---------------|------|------|----------------|----------|----------------------------|---------------|
| Positive       | Arginine      | Arg  | R    | 0              | 0        | 0                          | 0.641 *ProP*  |
|                | Histidine     | His  | H    | 5              | 5        | 0                          |               |
|                | Lysine        | Lys  | K    | 325            | 323      | 294                        |               |
| Negative       | Aspartic acid | Asp  | D    | 0              | 0        | 0                          | 0.648 *ProP*  |
|                | Glutamic acid | Glu  | E    | 0              | 0        | 0                          |               |
| Polar          | Serine        | Ser  | S    | 16             | 16       | 13                         | 0.651 *ProP*  |
|                | Threonine     | Thr  | T    | 1              | 1        | 1                          | 0.666 *ProP*  |
|                | Asparagine    | Asn  | N    | wt             | wt       | wt                         | 0.620 *ProP*  |
|                | Glutamine     | Gln  | Q    | 0              | 0        | 0                          | 0             |
| Special        | Cystine       | Cys  | C    | 0              | 0        | 0                          | 0             |
|                | Glycine       | Gly  | G    | 0              | 0        | 0                          |               |
|                | Proline       | Pro  | P    | 0              | 0        | 0                          |               |
| Hydrophobic    | Alanine       | Ala  | A    | 0              | 0        | 0                          | 0.633 *ProP*  |
|                | Valine        | Val  | V    | 0              | 0        | 0                          |               |
|                | Isoleucine    | Ile  | I    | 2              | 2        | 2                          |               |
|                | Leucine       | Leu  | L    | 0              | 0        | 0                          |               |
|                | Methionine    | Met  | M    | 0              | 0        | 0                          | 0.616 *ProP*  |
|                | Phenylalanine | Phe  | F    | 0              | 0        | 0                          |               |
|                | Tyrosine      | Tyr  | Y    | 2              | 2        | 2                          |               |
|                | Tryptophan    | Trp  | W    | 0              | 0        | 0                          |               |
| Deletion (*)   |               |      |      | 378            | 374      | 315                        | 0.680 *ProP*  |
| Total variants |               |      |      | 729            | 723      | 627                        |               |
| Presumed wt    |               |      |      | 370,761        | 370,094  | 268,419                    |               |
